# Supplementary material for: Semantic competence and prototypical verbalizations are associated with higher OSCE and global medical degree scores: a multi-theory pilot study on year 6 medical student verbalizations
Source: publisher site journal article supplement (doi:10.1515/dx-2021-0048), 2023-03-14
Supplement: Supplementary file 1 [file j_dx-2021-0048_suppl_001.docx]

**Supplemental Material**

**Table 1:** List of semantic transformations

| **Semantic transformations** | Description/Annotations |
| --- | --- |
| Previous medical history | |
| **Hypertension, arterial hypertension** | **high blood pressure » hypertension**   - Qualitatively weak - Frequent colloquial use; unclear semantic value |
| **Dyslipidemia, hyperlipemia** | **high cholesterol, cholesterol » dyslipedemia**   - Qualitatively weak |
| **Diabetes, diabetes mellitus, diabetes type 2** | **high blood sugar » diabetes**   - Qualitatively weak - Frequent colloquial use; unclear semantic value |
| **Angiotensin-converting enzyme inhibitors (ACEi)**  **Beta-blocker**  **Diuretics**  **Anti-hypertensive**  **Antidyslipidemic**  **Antiplatelet/antiaggregant**  **Dual antiplatelet therapy (DAPT)**  **Anticoagulation** | **specific drugs** (e.g. ramipril, furosemide, aspirin) » **drug class/clinical effect** (e.g. ACEi, diuretics, antiplatelet)   - Qualitatively good - Identifies a specific drug class or mechanism of action - **DAPT** (e.g. aspirin and clopidogrel or ticagrelor):qualitatively strong, identifies a therapeutic strategy |
| **Cardiac intervention**  **Revascularization surgery**  **To revascularize, to deobstruct**  **‘Interventioned’ coronary heart disease** | **catheterization, heart surgery » intervention/revascularization/coronary artery bypass surgery/angioplasty**   - Revascularization, coronary artery bypass surgery or angioplasty: qualitatively strong, identifies a treatment process or a specific technical approach - Intervention or ‘interventioned’ disease: qualitatively good, identifies a shift in the clinical status of coronary heart disease (non-‘interventioned’ to ‘interventioned’) - To revascularize or to deobstruct: qualitatively good, is a mechanistical description of the treatment (to recover vascular flow, to remove an obstruction) |
| **Infarction**  **Myocardial infarction, acute myocardial infarction**  **Acute coronary syndrome (ACS)**  **Ischaemic event**  **Coronary event**  **Coronary occlusion/stenosis** | **patient description of previous ACS » infarction/ischaemic event/ACS/coronary occlusion/stenosis**  **catheterization » cardiac intervention, revascularization**   - Infarction: qualitatively weak, frequent colloquial use, unclear semantic value - Ischaemic/coronary event: qualitatively good, identifies a mechanism (ischaemia) which is anatomically situated (coronary artery) - Coronary occlusion/stenosis: qualitatively good, identifies a specific pathological mechanism - Myocardial infarction, acute myocardial infarction or acute coronary syndrome: qualitatively strong, identifies clinical entities |
| Current disease/Clinical presentation | |
| **Thoracalgia**  **Thoracic, precordial, retrosternal, central pain** | **chest pain » thoracalgia/precordial/retrosternal/central pain**   - Qualitatively good - Simple transformation into medical nomenclature |
| **Anginal, ‘Anginous’ pain**   - On exertion versus at rest - Acute versus chronic - Stable versus unstable | **precordial opressive radiating chest pain on exertion that alleviates at rest » angina**   - Qualitatively strong - Angina is a specific clinical entity that encompasses several lower-order concepts (described above); angina has the same descriptive/explanatory value than several lower-order concepts; the identification of chest pain as angina mandates specific therapy and follow-up - Exertion & rest and acute & chronic form two poles of clinically meaningful semantic axes that help to characterize chest pain and the clinical presentation - Stable and unstable angina are qualitatively strong: two different clinical entities that require different approaches; they form two poles of a semantic axis (qualifier), in this case, two clinically meaningful opposing diagnosis |
| **Dyspnea, dyspnea on exertion, fatigue**   - Minimal, mild or moderate exertion   **Edema** | **breathlessness/tiredness » dyspnea, fatigue**  **swollen feet » edema**   - Qualitatively good - Simple transformation into medical nomenclature - The degree of exertion required to cause breathlessness is a semantic qualifier that helps to characterize the clinical presentation |
| **Heart failure** | **breathlessness when climbing stairs, breathlessness when lying down, swollen feet » dyspnea on exertion, orthopnea, peripheral edema » heart failure**   - Qualitatively strong - Heart failure is a specific clinical entity that encompasses several lower-order concepts (described above); heart failure has the same descriptive/explanatory value than several lower-order concepts; the identification of heart failure mandates specific therapy and follow-up |
